# Supplementary material for: Comparison of Nutritional Profiles of Super Worm (Zophobas morio) and Yellow Mealworm (Tenebrio molitor) as Alternative Feeds Used in Animal Husbandry: Is Super Worm Superior?
Source: MDPI journal article supplement (doi:10.3390/ani12101277), 2022-05-17
Supplement: s1 [file s1]

Table S1. Proximate composition of full-fat larval meal.

| Insect species | Substrate | Time of harvest | Yield (g) | Proteins (%) (n = 3) | Crude fat (%) (n = 3) | Crude ash (%) (n = 3) | Crude fibre (%) (n = 3) | Protein digestibility (%) (n=3) |
|----------------|-----------|-----------------|-----------|----------------------|-----------------------|-----------------------|-------------------------|---------------------------------|
| TM             | M         | 1               | 221.20    | 37.27                | 31.87                 | 5.02                  | 6.17                    | 84.93                           |
| TM             | K         | 1               | 178.41    | 40.87                | 28.46                 | 5.73                  | 7.34                    | 84.67                           |
| TM             | S         | 1               | 206.57    | 37.96                | 31.03                 | 6.84                  | 8.51                    | 85.59                           |
| TM             | M         | 2               | 291.16    | 37.30                | 33.54                 | 4.80                  | 8.36                    | 83.05                           |
| TM             | K         | 2               | 273.38    | 41.90                | 30.23                 | 4.79                  | 5.28                    | 84.30                           |
| TM             | S         | 2               | 226.90    | 42.34                | 28.85                 | 5.13                  | 8.12                    | 84.66                           |
| TM             | M         | 3               | 302.40    | 39.63                | 33.53                 | 4.91                  | 6.72                    | 85.06                           |
| TM             | K         | 3               | 323.68    | 42.11                | 27.16                 | 5.27                  | 6.33                    | 84.80                           |
| TM             | S         | 3               | 226.90    | 42.14                | 24.83                 | 5.16                  | 5.53                    | 83.32                           |
| ZM             | M         | 1               | 130.00    | 36.02                | 33.69                 | 3.76                  | 5.95                    | 83.77                           |
| ZM             | K         | 1               | 166.12    | 41.36                | 33.13                 | 2.89                  | 5.73                    | 84.05                           |
| ZM             | S         | 1               | 167.08    | 33.94                | 33.41                 | 2.99                  | 5.89                    | 82.05                           |
| ZM             | M         | 2               | 132.03    | 42.26                | 37.58                 | 2.88                  | 6.72                    | 83.92                           |
| ZM             | K         | 2               | 177.02    | 42.82                | 44.48                 | 3.21                  | 7.96                    | 82.23                           |
| ZM             | S         | 2               | 136.74    | 42.81                | 36.50                 | 3.22                  | 7.00                    | 83.18                           |
| ZM             | M         | 3               | 139.83    | 39.59                | 32.35                 | 2.69                  | 9.12                    | 83.61                           |
| ZM             | K         | 3               | 177.03    | 37.48                | 34.47                 | 3.00                  | 7.70                    | 83.56                           |
| ZM             | S         | 3               | 111.88    | 35.95                | 40.81                 | 3.13                  | 8.91                    | 83.45                           |

Results are presented as mean value on dry matter. TM, *Tenebrio molitor*; ZM, *Zophobas morio*; M, substrate that included cabbage, carrot and flaxseed; K, substrate that included cabbage; S, substrate that included carrot; times 1, 2 and 3 represent 90, 97 and 104 days, respectively. Protein content is expressed by using nitrogen-to-protein conversion factor of kp 4.76.

Table S2. Amino acid composition of full-fat larval meal.

| Insect species | Substrate | Time of harvest | Asp           | Tyr   | Arg  | Ser  | Glu   | Pro   | Gly  | Ala  | Cys  | Val       | Met  | Isl  | Leu  | Thr  | Phe  | His  | Lys  |  |  |
|----------------|-----------|-----------------|---------------|-------|------|------|-------|-------|------|------|------|-----------|------|------|------|------|------|------|------|--|--|
|                |           |                 | Non-essential |       |      |      |       |       |      |      |      | Essential |      |      |      |      |      |      |      |  |  |
|                |           |                 | % (n = 3)     |       |      |      |       |       |      |      |      |           |      |      |      |      |      |      |      |  |  |
| TM             | M         | 1               | 8.98          | 9.68  | 6.81 | 3.97 | 12.39 | 10.11 | 4.88 | 6.29 | 1.46 | 5.92      | 1.85 | 5.16 | 8.02 | 4.57 | 5.00 | 4.18 | 6.67 |  |  |
| TM             | K         | 1               | 8.47          | 9.64  | 6.87 | 3.86 | 11.24 | 10.73 | 4.45 | 5.62 | 1.27 | 5.44      | 1.92 | 5.04 | 7.46 | 3.62 | 4.63 | 4.33 | 6.51 |  |  |
| TM             | S         | 1               | 8.59          | 10.08 | 7.05 | 3.99 | 11.37 | 11.27 | 4.48 | 4.46 | 1.33 | 5.46      | 2.04 | 5.29 | 7.25 | 3.99 | 4.40 | 4.67 | 6.72 |  |  |
| TM             | M         | 2               | 9.74          | 9.66  | 7.10 | 4.18 | 13.09 | 10.49 | 5.23 | 5.33 | 1.50 | 6.14      | 1.79 | 5.29 | 8.19 | 3.73 | 4.33 | 4.37 | 6.99 |  |  |
| TM             | K         | 2               | 8.67          | 9.15  | 6.07 | 3.70 | 11.41 | 9.38  | 4.48 | 4.45 | 1.37 | 5.23      | 1.75 | 4.74 | 7.18 | 4.37 | 4.77 | 3.99 | 7.17 |  |  |
| TM             | S         | 2               | 9.02          | 9.41  | 6.74 | 3.95 | 12.04 | 10.45 | 4.83 | 4.87 | 1.51 | 5.61      | 1.79 | 5.06 | 7.55 | 4.29 | 4.96 | 4.25 | 6.62 |  |  |
| TM             | M         | 3               | 8.26          | 8.90  | 5.96 | 3.62 | 11.21 | 9.16  | 4.52 | 4.58 | 1.42 | 5.34      | 1.65 | 4.61 | 7.29 | 4.02 | 4.36 | 3.85 | 6.26 |  |  |
| TM             | K         | 3               | 8.22          | 8.76  | 6.21 | 3.66 | 10.78 | 9.52  | 4.23 | 4.27 | 1.29 | 5.00      | 1.63 | 4.60 | 6.75 | 4.21 | 4.20 | 4.00 | 6.08 |  |  |
| TM             | S         | 3               | 8.57          | 8.77  | 6.13 | 3.72 | 11.33 | 9.44  | 4.48 | 4.53 | 1.43 | 5.36      | 1.67 | 4.70 | 7.31 | 4.06 | 4.75 | 3.87 | 6.25 |  |  |
| ZM             | M         | 1               | 9.34          | 12.12 | 8.14 | 4.83 | 13.51 | 10.60 | 5.44 | 6.68 | 0.00 | 7.02      | 1.92 | 6.88 | 7.29 | 5.09 | 4.90 | 5.16 | 7.22 |  |  |
| ZM             | K         | 1               | 8.15          | 10.95 | 7.37 | 4.16 | 11.58 | 9.36  | 4.85 | 6.11 | 0.00 | 6.33      | 1.77 | 5.99 | 6.67 | 4.50 | 4.11 | 4.62 | 6.28 |  |  |
| ZM             | S         | 1               | 9.48          | 11.38 | 7.85 | 4.71 | 13.87 | 10.07 | 5.62 | 7.26 | 0.00 | 7.20      | 2.02 | 6.74 | 7.46 | 4.96 | 5.29 | 4.78 | 7.13 |  |  |
| ZM             | M         | 2               | 8.11          | 10.60 | 7.56 | 4.19 | 11.65 | 9.11  | 4.63 | 5.79 | 0.00 | 6.07      | 1.88 | 6.07 | 6.84 | 4.53 | 4.03 | 4.74 | 6.41 |  |  |
| ZM             | K         | 2               | 9.31          | 11.07 | 8.18 | 4.77 | 13.37 | 9.89  | 5.36 | 6.83 | 0.00 | 6.95      | 1.65 | 6.47 | 7.25 | 5.00 | 4.83 | 5.07 | 6.95 |  |  |
| ZM             | S         | 2               | 7.92          | 10.44 | 7.02 | 4.04 | 11.17 | 8.50  | 4.56 | 5.76 | 0.00 | 6.03      | 1.73 | 5.71 | 6.39 | 4.35 | 4.19 | 4.45 | 6.08 |  |  |
| ZM             | M         | 3               | 9.20          | 11.58 | 7.30 | 4.87 | 13.62 | 10.27 | 5.72 | 7.43 | 0.00 | 7.37      | 1.44 | 6.45 | 7.23 | 4.81 | 5.20 | 4.87 | 6.64 |  |  |
| ZM             | K         | 3               | 9.90          | 11.99 | 8.53 | 4.88 | 14.40 | 10.03 | 5.67 | 7.23 | 0.00 | 7.23      | 2.02 | 6.97 | 7.68 | 5.15 | 5.41 | 4.95 | 7.43 |  |  |
| ZM             | S         | 3               | 9.38          | 11.69 | 8.15 | 4.88 | 13.68 | 10.35 | 5.66 | 7.33 | 0.00 | 7.20      | 2.00 | 6.68 | 7.46 | 4.95 | 5.27 | 4.88 | 7.20 |  |  |

Results are presented as mean value, as % AA of protein content (kp 4.76). TM, *Tenebrio molitor*; ZM, *Zophobas morio*; M, substrate that included cabbage, carrot and flaxseed; K, substrate that included cabbage; S, substrate that included carrot; times 1, 2 and 3 represent 90, 97 and 104 days, respectively; Asp, aspartic acid ; Thr, threonine; Ser, serine; Glu, glutamic acid; Pro, proline; Gly, glycine; Ala, alanine; Cys, cystine; Val, valine; Met, methionine; Isl, isoleucine; Leu, leucine; Tyr, tyrosine; Phe, phenylalanine; His, histidine; Lys, lysine; Arg, arginine.

Table S3. Mineral content of full-fat larval meal.

| Insect species  | Substrate | Time of harvest | Ca    | K      | Mg     | Na     | Fe    | Zn    | Mn   | Cu   | P      |
|-----------------|-----------|-----------------|-------|--------|--------|--------|-------|-------|------|------|--------|
| mg/100g (n = 3) |           |                 |       |        |        |        |       |       |      |      |        |
| TM              | M         | 1               | 24.30 | 827.42 | 181.19 | 168.72 | 5.05  | 12.04 | 0.82 | 1.51 | 753.23 |
| TM              | K         | 1               | 26.82 | 878.14 | 192.70 | 117.72 | 4.22  | 13.59 | 1.30 | 1.89 | 794.90 |
| TM              | S         | 1               | 25.95 | 741.74 | 205.82 | 148.67 | 4.16  | 12.48 | 1.07 | 1.83 | 800.28 |
| TM              | M         | 2               | 26.60 | 862.89 | 216.83 | 153.61 | 4.27  | 11.42 | 0.88 | 2.02 | 754.81 |
| TM              | K         | 2               | 32.28 | 762.27 | 227.71 | 153.27 | 5.20  | 13.76 | 1.14 | 2.35 | 782.99 |
| TM              | S         | 2               | 27.28 | 863.09 | 267.77 | 160.52 | 5.88  | 15.60 | 1.63 | 2.75 | 888.77 |
| TM              | M         | 3               | 29.54 | 868.59 | 240.66 | 144.86 | 5.39  | 11.04 | 0.97 | 1.84 | 751.56 |
| TM              | K         | 3               | 29.02 | 831.48 | 238.46 | 157.12 | 6.66  | 13.11 | 1.23 | 2.29 | 833.68 |
| TM              | S         | 3               | 24.89 | 786.33 | 277.14 | 181.96 | 5.38  | 16.05 | 1.95 | 2.37 | 915.80 |
| ZM              | M         | 1               | 38.68 | 601.40 | 98.12  | 155.86 | 8.91  | 7.48  | 0.85 | 1.04 | 547.11 |
| ZM              | K         | 1               | 59.54 | 590.27 | 91.16  | 138.51 | 6.24  | 5.69  | 0.97 | 1.27 | 628.47 |
| ZM              | S         | 1               | 39.56 | 493.19 | 71.95  | 108.00 | 6.02  | 5.31  | 1.03 | 0.94 | 541.14 |
| ZM              | M         | 2               | 66.85 | 615.97 | 95.52  | 183.47 | 11.58 | 7.49  | 0.97 | 1.20 | 570.06 |
| ZM              | K         | 2               | 64.25 | 665.71 | 100.23 | 152.55 | 4.29  | 7.26  | 1.13 | 1.31 | 566.04 |
| ZM              | S         | 2               | 40.74 | 643.96 | 100.98 | 167.23 | 6.65  | 7.03  | 1.19 | 1.21 | 605.15 |
| ZM              | M         | 3               | 65.21 | 615.27 | 90.68  | 158.66 | 3.98  | 6.84  | 0.98 | 1.11 | 651.15 |
| ZM              | K         | 3               | 55.92 | 552.36 | 99.87  | 187.70 | 10.77 | 6.41  | 1.20 | 1.32 | 625.99 |
| ZM              | S         | 3               | 65.81 | 641.58 | 95.16  | 154.43 | 4.20  | 6.70  | 0.94 | 1.05 | 612.89 |

Results are presented as mean value, as mg/100g of dry matter. TM, *Tenebrio molitor*; ZM, *Zophobas morio*; M, substrate that included cabbage, carrot and flaxseed; K, substrate that included cabbage; S, substrate that included carrot; times 1, 2 and 3 represent 90, 97 and 104 days, respectively.

Table S4. Fatty acid profile of full-fat larval meal.

| Insect species | Substrate | Time of harvest | C8:0                  | C10:0 | C12:0 | C14:0 | C15:0 | C16:0 | C16:1 | C17:0 | C17:1 | C18:0 | C18:1n9c | C18:2n6c | C20:0 | C18:3n3 | SFA  | MUFA  | PUFA  | n6/n3 |
|----------------|-----------|-----------------|-----------------------|-------|-------|-------|-------|-------|-------|-------|-------|-------|----------|----------|-------|---------|------|-------|-------|-------|
|                |           |                 | % fatty acids (n = 3) |       |       |       |       |       |       |       |       |       |          |          |       |         |      |       |       |       |
| TM             | M         | 1               |                       |       |       |       |       |       |       |       |       |       |          |          |       |         | 22.9 |       |       |       |
|                |           |                 | 0                     | 0     | 0.2   | 2.0   | 0.1   | 16.2  | 0.6   | 1.4   | 0     | 3.0   | 40.3     | 25.6     | 0     | 10.5    | 4    | 40.96 | 36.1  | 2.5   |
| TM             | K         | 1               | 0                     | 0     | 0.3   | 2.1   | 0.1   | 18.8  | 0.8   | 1.6   | 0     | 2.9   | 46.7     | 25.4     | 0     | 1.4     | 25.7 | 47.42 | 26.8  | 18.1  |
| TM             | S         | 1               |                       |       |       |       |       |       |       |       |       |       |          |          |       |         | 26.1 |       |       |       |
|                |           |                 | 0                     | 0     | 0.3   | 2.8   | 0.1   | 18.2  | 0.9   | 1.7   | 0     | 3.1   | 47.7     | 24.2     | 0     | 0.9     | 9    | 48.65 | 25.16 | 26.9  |
| TM             | M         | 2               |                       |       |       |       |       |       |       |       |       |       |          |          |       |         | 21.8 |       |       |       |
|                |           |                 | 0                     | 0     | 0.2   | 2.1   | 0.1   | 15.5  | 0.6   | 1.6   | 0     | 2.5   | 41       | 23.6     | 0     | 12.9    | 8    | 41.56 | 36.56 | 1.8   |
| TM             | K         | 2               |                       |       |       |       |       |       |       |       |       |       |          |          |       |         | 24.8 |       |       |       |
|                |           |                 | 0                     | 0     | 0.3   | 2.2   | 0.1   | 18.2  | 0.7   | 1.8   | 0     | 2.3   | 48.7     | 24.5     | 0     | 1.2     | 9    | 49.39 | 25.72 | 20.4  |
| TM             | S         | 2               | 0                     | 0     | 0.3   | 2.5   | 0.1   | 18.6  | 0.8   | 1.9   | 0     | 2.6   | 47.1     | 24.8     | 0     | 1.1     | 26.1 | 47.99 | 25.91 | 22.5  |
| TM             | M         | 3               |                       |       |       |       |       |       |       |       |       |       |          |          |       |         | 21.8 |       |       |       |
|                |           |                 | 0                     | 0     | 0.2   | 2.2   | 0.1   | 15.3  | 0.7   | 1.5   | 0     | 2.5   | 40.6     | 23       | 0     | 13.9    | 3    | 41.3  | 36.86 | 1.6   |
| TM             | K         | 3               |                       |       |       |       |       |       |       |       |       |       |          |          |       |         | 26.0 |       |       |       |
|                |           |                 | 0                     | 0     | 0.3   | 2.4   | 0.2   | 18.3  | 0.7   | 2.0   | 0     | 2.9   | 46.8     | 25.4     | 0     | 1.1     | 3    | 47.5  | 26.47 | 23.1  |
| TM             | S         | 3               |                       |       |       |       |       |       |       |       |       |       |          |          |       |         | 26.3 |       |       |       |
|                |           |                 | 0                     | 0     | 0.3   | 2.7   | 0.2   | 18.9  | 0.9   | 2.0   | 0     | 2.2   | 48.6     | 23.1     | 0     | 1.0     | 2    | 49.58 | 24.1  | 23.1  |
| ZM             | M         | 1               | 0.6                   | 0.1   | 0.1   | 1.2   | 0.3   | 26.0  | 2.8   | 0.7   | 0.5   | 5.8   | 30.6     | 18.1     | 0.2   | 13.1    | 34.9 | 33.9  | 31.3  | 1.4   |
| ZM             | K         | 1               | 0.5                   | 0.1   | 0.1   | 1.2   | 0.3   | 30.4  | 2.4   | 0.9   | 0.5   | 7.7   | 28.7     | 25.5     | 0.2   | 1.5     | 41.4 | 31.6  | 27.0  | 16.7  |
| ZM             | S         | 1               | 0.6                   | 0.1   | 0.1   | 1.3   | 0.3   | 31.6  | 2.4   | 0.8   | 0.5   | 7.3   | 29.0     | 24.6     | 0.2   | 1.1     | 42.3 | 32.0  | 25.7  | 21.4  |
| ZM             | M         | 2               | 0.7                   | 0.1   | 0.1   | 1.2   | 0.3   | 26.1  | 3.0   | 0.7   | 0.5   | 5.7   | 30.6     | 18.1     | 0.2   | 12.9    | 35.0 | 34.1  | 30.9  | 1.4   |
| ZM             | K         | 2               | 0.6                   | 0.1   | 0.1   | 1.3   | 0.3   | 31.0  | 2.7   | 0.9   | 0.6   | 7.1   | 28.7     | 24.9     | 0.2   | 1.5     | 41.7 | 31.9  | 26.4  | 16.7  |
| ZM             | S         | 2               | 0.6                   | 0.1   | 0.1   | 1.4   | 0.3   | 32.8  | 2.6   | 0.9   | 0.5   | 6.9   | 29.4     | 23.1     | 0.2   | 1.1     | 43.2 | 32.5  | 24.2  | 21.1  |
| ZM             | M         | 3               | 0.6                   | 0.1   | 0.1   | 1.3   | 0.3   | 26.6  | 3.0   | 0.8   | 0.5   | 5.8   | 30.7     | 18.2     | 0.2   | 11.8    | 35.8 | 34.2  | 30.0  | 1.5   |
| ZM             | K         | 3               | 0.7                   | 0.1   | 0.1   | 1.4   | 0.4   | 31.1  | 3.0   | 1.0   | 0.7   | 6.5   | 28.6     | 23.9     | 0.2   | 2.3     | 41.4 | 32.3  | 26.2  | 10.3  |
| ZM             | S         | 3               | 0.7                   | 0.1   | 0.1   | 1.4   | 0.3   | 32.6  | 0.8   | 0.9   | 0.5   | 7.2   | 29.6     | 24.3     | 0.2   | 1.3     | 43.4 | 30.9  | 25.6  | 18.7  |

Results are presented as mean value, as% fatty acids in total identified FA. TM, *Tenebrio molitor*; ZM, *Zophobas morio*; M, substrate that included cabbage, carrot and flaxseed; K, substrate that included cabbage; S, substrate that included carrot; times 1, 2 and 3 represent 90, 97 and 104 days of harvest, respectively; SFA, saturated fatty acid; MUFA, monounsaturated fatty acid; PUFA, polyunsaturated fatty acid.

Table S5. Multi-objective optimization of the outputs of the ANN.

| Proximate composition |         | Amino acid<br>(% on protein content) |       | Mineral content (mg/100g d.m.) |        | Fatty acid composition (% in<br>total FA content) |      |
|-----------------------|---------|--------------------------------------|-------|--------------------------------|--------|---------------------------------------------------|------|
| Yield                 | (g)     | Threonine                            | 4.96  | Ca                             | 24.89  | C18:2n6c                                          | 25.6 |
|                       | 302.40  | Valine                               | 7.13  | K                              | 786.33 | C18:3n3                                           | 10.5 |
| Crude protein         | (% d.m) | Methionine                           | 2.02  | Mg                             | 277.14 | n6/n3                                             | 2.44 |
|                       | 39.63   | Isoleucine                           | 6.72  | Na                             | 181.96 |                                                   |      |
| Crude fat             | 33.53   | Leucine                              | 7.48  | P                              | 915.80 |                                                   |      |
| Crude ash             | 4.91    | Tyrosine                             | 11.40 |                                |        |                                                   |      |
| Crude fiber           | 6.72    | Phenylalanine                        | 5.30  |                                |        |                                                   |      |
| Protein Digestibility | 85.06   | Histidine                            | 4.78  |                                |        |                                                   |      |
|                       |         | Lysine                               | 7.12  |                                |        |                                                   |      |

d.m., dry matter.
